# Supplementary material for: Efficient promotion of charge separation and suppression of charge recombination by blending PCBM and its dimer as electron transport layer in inverted perovskite solar cells
Source: Royal Society of Chemistry journal article supplement (doi:10.1039/c6ra22023a), 2016-01-01
Supplement: c6ra22023a1.pdf [file c6ra22023a1.pdf]

**Efficient promotion of charge separation and suppression of charge recombination by blending PCBM and its dimer as electron transport layer in inverted perovskite solar cells**

*Jun Han, Hao-Yi Wang, Yi Wang, Man Yu, Shuai Yuan, Peili Sun, Yujun Qin,\* Zhi-Xin Guo, Jian-Ping Zhang, Xi-Cheng Ai\**

Department of Chemistry, Renmin University of China, Beijing 100872, P. R. China

E-mail: yjqin@ruc.edu.cn, xcai@ruc.edu.cn

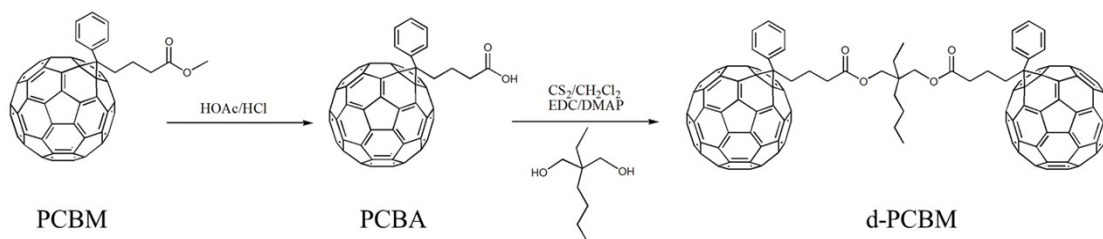

**Scheme S1** The synthetic route map of the dumb-belled PCBM dimer (d-PCBM).

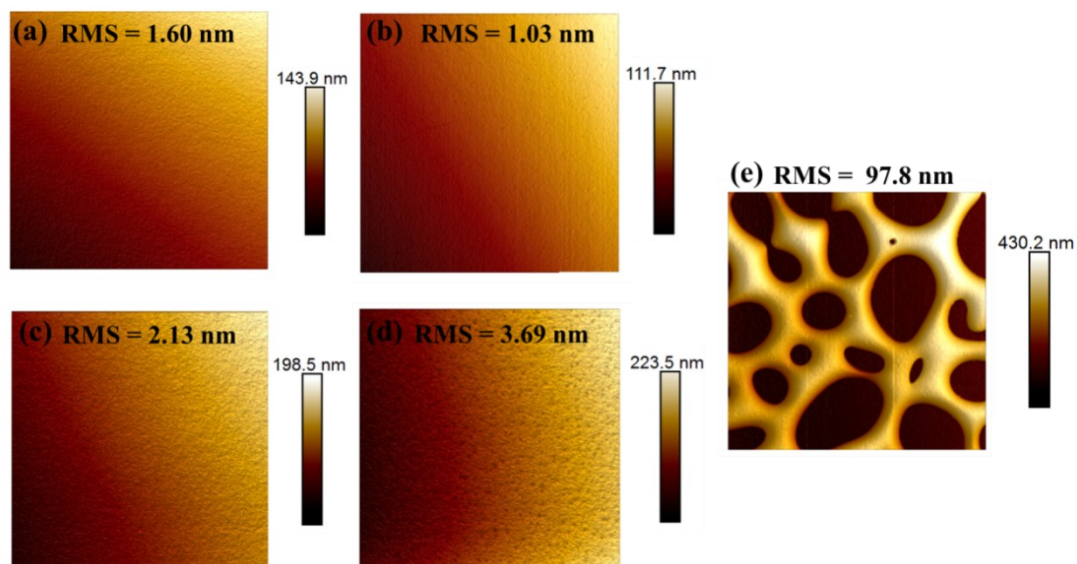

**Figure S1** AFM images (size: 30×30 μm) of (a) PCBM film, (b) PCBM:d-PCBM (6:1) film, (c) PCBM:d-PCBM (4:1) film, (d) PCBM:d-PCBM (1:1) film and (e) d-PCBM film on quartz substrates.

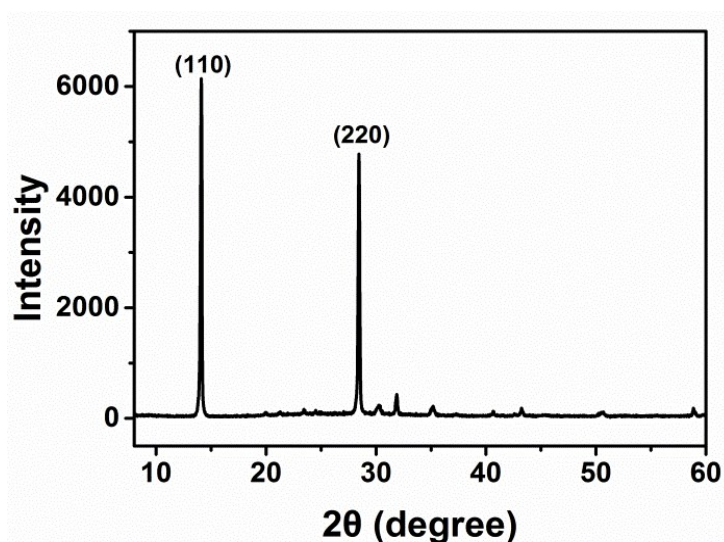

**Figure S2** XRD pattern of perovskite film on quartz substrate.

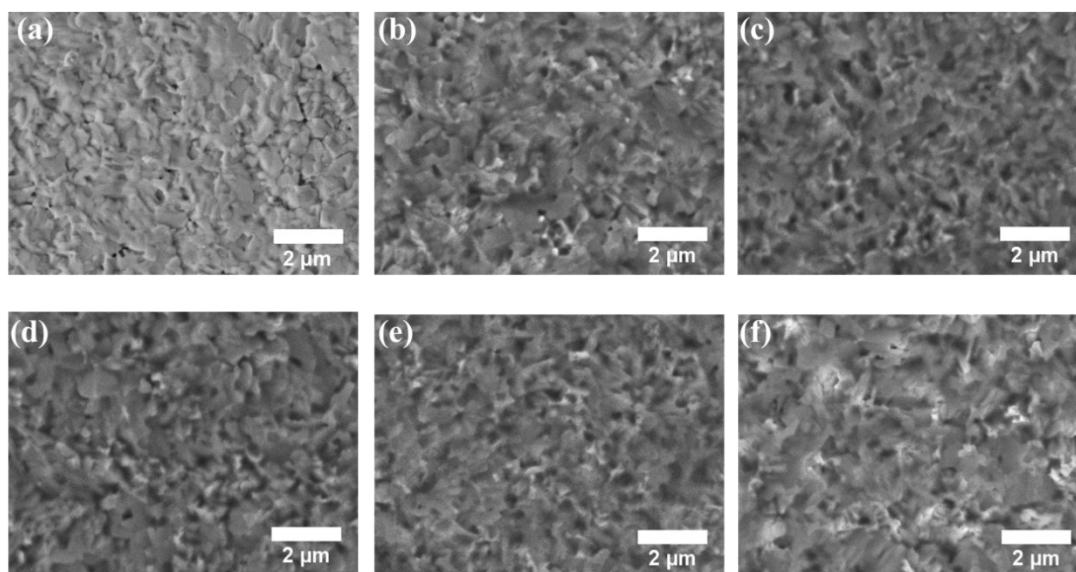

**Figure S3** SEM images of (a) perovskite film, (b) perovskite/PCBM film, (c) perovskite/PCBM:d-PCBM (6:1) film, (d) perovskite/PCBM:d-PCBM (4:1) film, (e) perovskite/PCBM:d-PCBM (1:1) film and (f) perovskite/d-PCBM film.

**Table S1** The peak positions of perovskite film and five different fullerene films coated perovskite layers from Gauss fitting the fluorescence spectra in Figure 3b.

| Film Samples           | Peak Position (nm) |
|------------------------|--------------------|
| Perovskite film        | 776                |
| PCBM film              | 778                |
| PCBM:d-PCBM (6:1) film | 795                |
| PCBM:d-PCBM (4:1) film | 794                |
| PCBM:d-PCBM (1:1) film | 784                |
| d-PCBM film            | 781                |

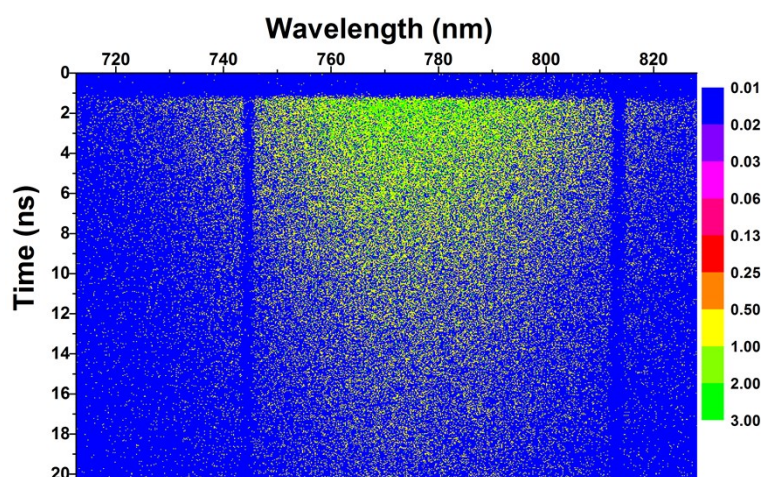

**Figure S4** Photoluminescence map of perovskite film on quartz substrate from streak camera measurement.

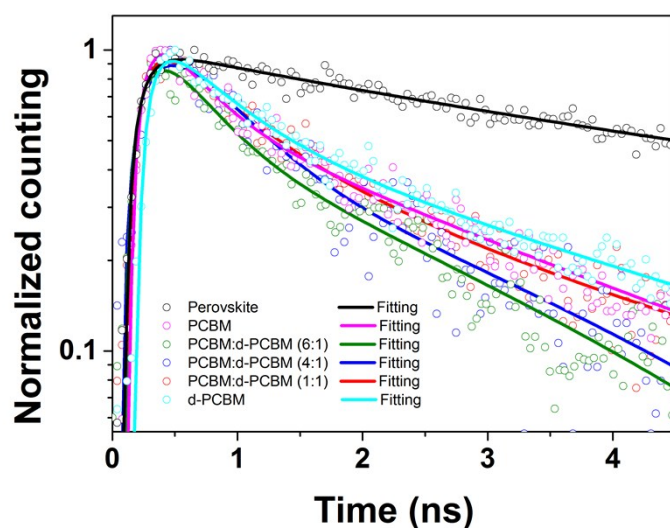

**Figure S5** Fluorescence dynamics of perovskite film and five different fullerene films coated perovskite layers extracted from streak camera measurement and related fitting curves.

**Table S2** Fluorescence decay lifetimes ( $\tau_{fl}$ ) extracted from fitting fluorescence dynamics of perovskite film and five different fullerene films coated perovskite layers.

| Film Samples           | $\tau_{fl}$ (ns) |
|------------------------|------------------|
| Perovskite film        | 6.101            |
| PCBM film              | 1.146            |
| PCBM:d-PCBM (6:1) film | 0.885            |
| PCBM:d-PCBM (4:1) film | 0.737            |
| PCBM:d-PCBM (1:1) film | 1.465            |
| d-PCBM film            | 1.627            |

**Table S3** Charge separation efficiency ( $\eta_{CS}$ ) calculated from fluorescence dynamics data of perovskite film and five different fullerene films coated perovskite layers.  $\eta_{CS} = k_p - k_0 / k_p$ , relevant parameters ( $\tau_{fl}$ ,  $k_p$ ,  $\tau_0$  and  $k_0$ ) are also shown.

| Film Samples           | $\tau_{fl}$ (ns) | $k_p$ (ns <sup>-1</sup> ) | $\tau_0$ (ns) | $k_0$ (ns <sup>-1</sup> ) | $k_p - k_0$ (ns <sup>-1</sup> ) | $\eta_{CS}$ |
|------------------------|------------------|---------------------------|---------------|---------------------------|---------------------------------|-------------|
| PCBM film              | 1.146            | 0.872                     |               |                           | 0.708                           | 0.684       |
| PCBM:d-PCBM (6:1) film | 0.885            | 1.130                     |               |                           | 0.966                           | 0.747       |
| PCBM:d-PCBM (4:1) film | 0.737            | 1.356                     | 6.101         | 0.164                     | 1.190                           | 0.784       |
| PCBM:d-PCBM (1:1) film | 1.465            | 0.682                     |               |                           | 0.518                           | 0.613       |
| d-PCBM film            | 1.627            | 0.615                     |               |                           | 0.451                           | 0.579       |

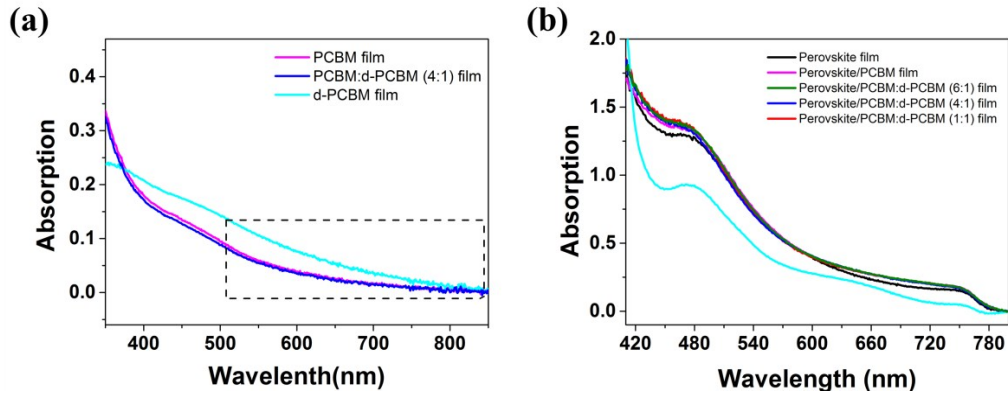

**Figure S6** (a) UV-vis absorption spectra of PCBM film, PCBM:d-PCBM (4:1) film and d-PCBM film on quartz substrates. (b) UV-vis absorption spectra of perovskite film, perovskite/PCBM film, perovskite/PCBM:d-PCBM (6:1) film, perovskite/PCBM:d-PCBM (4:1) film, perovskite/PCBM:d-PCBM (1:1) film and perovskite/d-PCBM film.

**Table S4** Statistical  $J_{SC}$ ,  $V_{OC}$ , FF and PCE of four PSC devices from eight cells for every type, by reverse scan.

| Solar Cells           | $J_{SC}$ (mA cm <sup>-2</sup> ) | $V_{OC}$ (V) | FF        | PCE (%)    |
|-----------------------|---------------------------------|--------------|-----------|------------|
| PCBM PSC              | 15.68±0.19                      | 0.911±0.040  | 0.72±0.02 | 10.34±0.26 |
| PCBM:d-PCBM (6:1) PSC | 15.90±0.24                      | 0.937±0.045  | 0.70±0.01 | 10.57±0.31 |
| PCBM:d-PCBM (4:1) PSC | 16.70±0.32                      | 0.941±0.021  | 0.73±0.01 | 11.43±0.24 |
| PCBM:d-PCBM (1:1) PSC | 16.32±0.20                      | 0.926±0.011  | 0.63±0.02 | 9.46±0.32  |

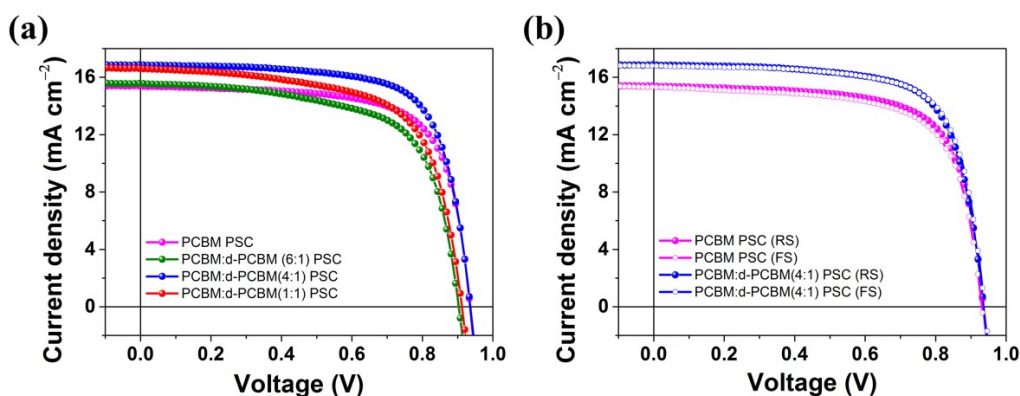

**Figure S7** (a)  $J$ - $V$  characteristic curves of four PSC devices based on PCBM, PCBM:d-PCBM (6:1), PCBM:d-PCBM (4:1) and PCBM:d-PCBM (1:1) by reverse scan. (b)  $J$ - $V$  characteristic curves of PCBM PSC and PCBM:d-PCBM (4:1) PSC by reverse scan and forward scan.

**Table S5**  $J_{SC}$ ,  $V_{OC}$ , FF and PCE of four PSC devices with the PCEs approaching to the statistical average data, by reverse scan.

| Solar Cells           | $J_{SC}$ (mA cm <sup>-2</sup> ) | $V_{OC}$ (V) | FF   | PCE (%) |
|-----------------------|---------------------------------|--------------|------|---------|
| PCBM PSC              | 15.49                           | 0.93         | 0.70 | 10.11   |
| PCBM:d-PCBM (6:1) PSC | 15.68                           | 0.92         | 0.72 | 10.39   |
| PCBM:d-PCBM (4:1) PSC | 16.83                           | 0.92         | 0.74 | 11.50   |
| PCBM:d-PCBM (1:1) PSC | 16.37                           | 0.93         | 0.64 | 9.70    |

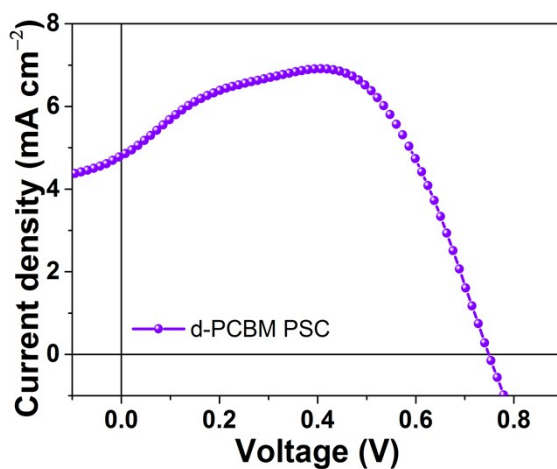

**Figure S8**  $J$ - $V$  characteristic curve of pure d-PCBM based PSC by reverse scan.

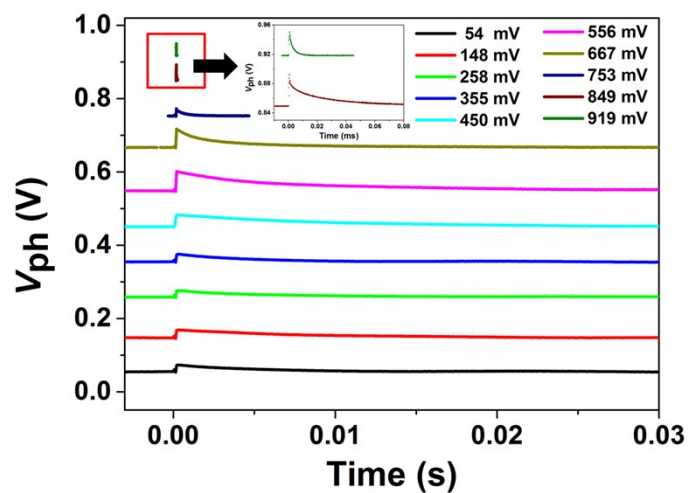

**Figure S9** TPV decay traces at diverse photo-induced voltage for PCBM:d-PCBM (4:1) PSC.

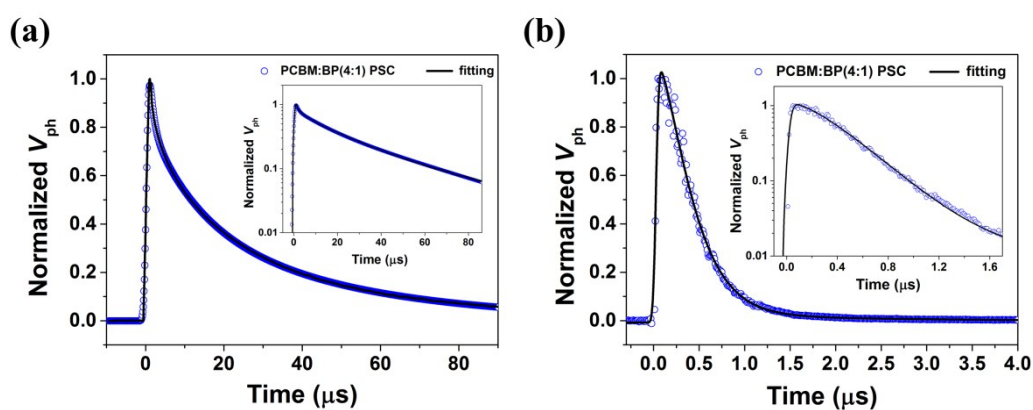

**Figure S10** (a) Exponential fitting example of TPV decay trace with a steady photovoltage of 850 mV for PCBM:d-PCBM (4:1) PSC. The inset shows the semi-logarithmic scale decay trace. (b) The corresponding photocurrent traces at the same illumination as TPV measurement at 850 mV at the linear and semi-logarithmic scale. The decay trace is also fitted by exponential function.
